# Supplementary material for: Hypoxia-induced long noncoding RNA NR2F1-AS1 maintains pancreatic cancer proliferation, migration, and invasion by activating the NR2F1/AKT/mTOR axis
Source: Springer Nature journal article supplement (doi:10.1038/s41419-022-04669-0), 2022-03-14

FIG.2F

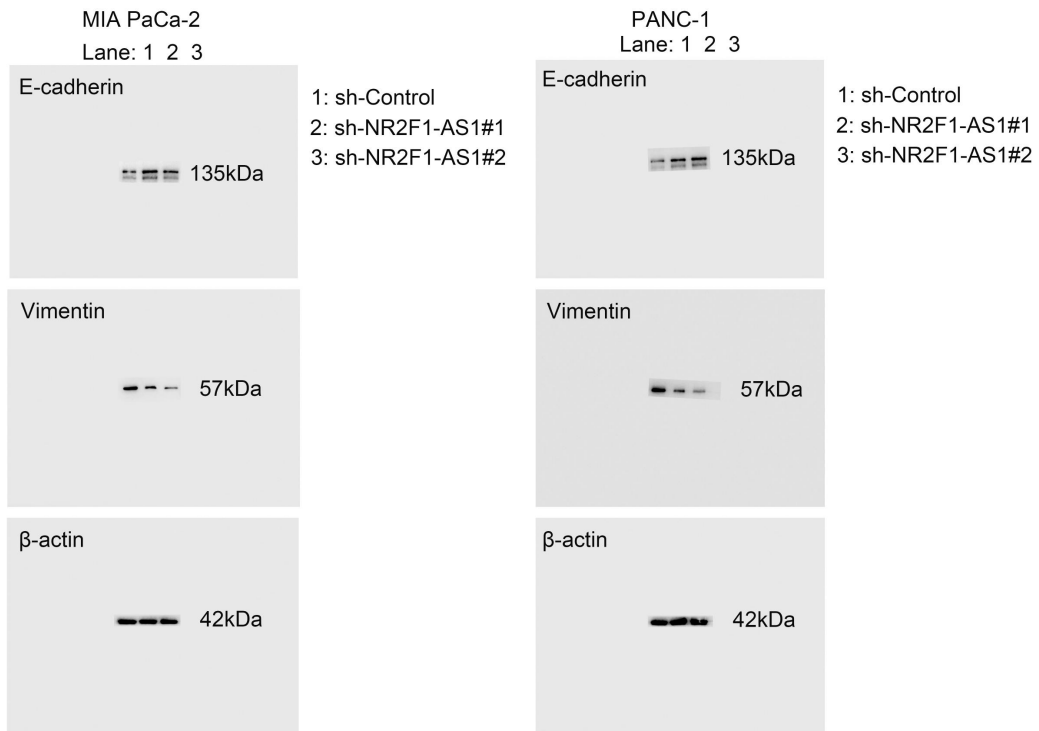

FIG.4F

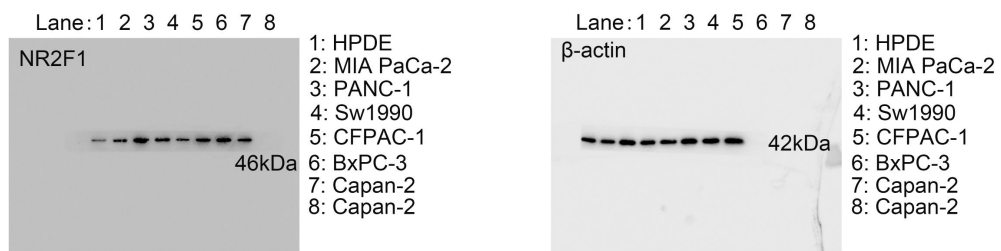

FIG.4J

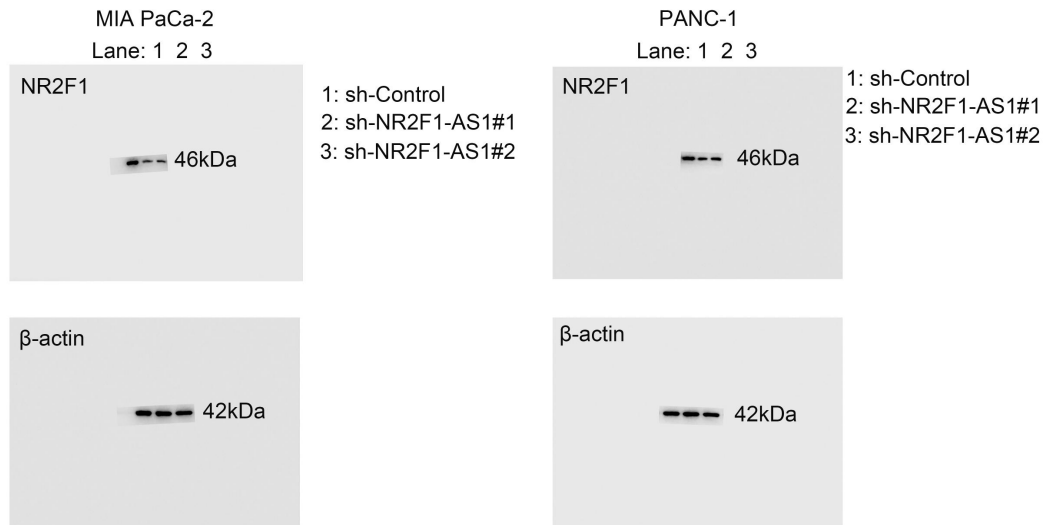

FIG.6B MIA PaCa-2

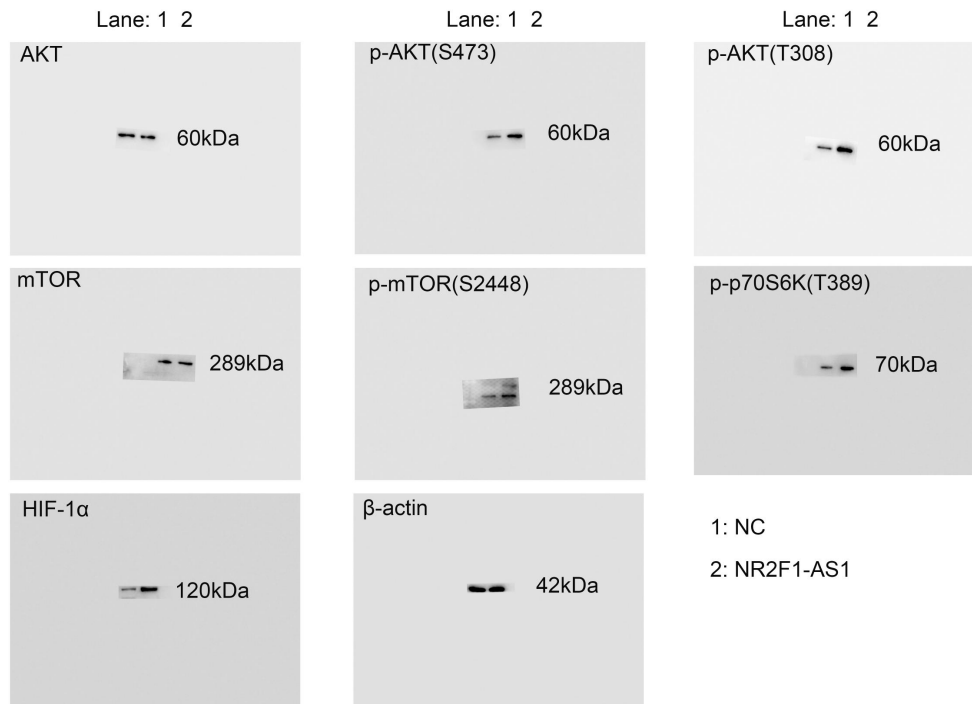

FIG.6B MIA PaCa-2

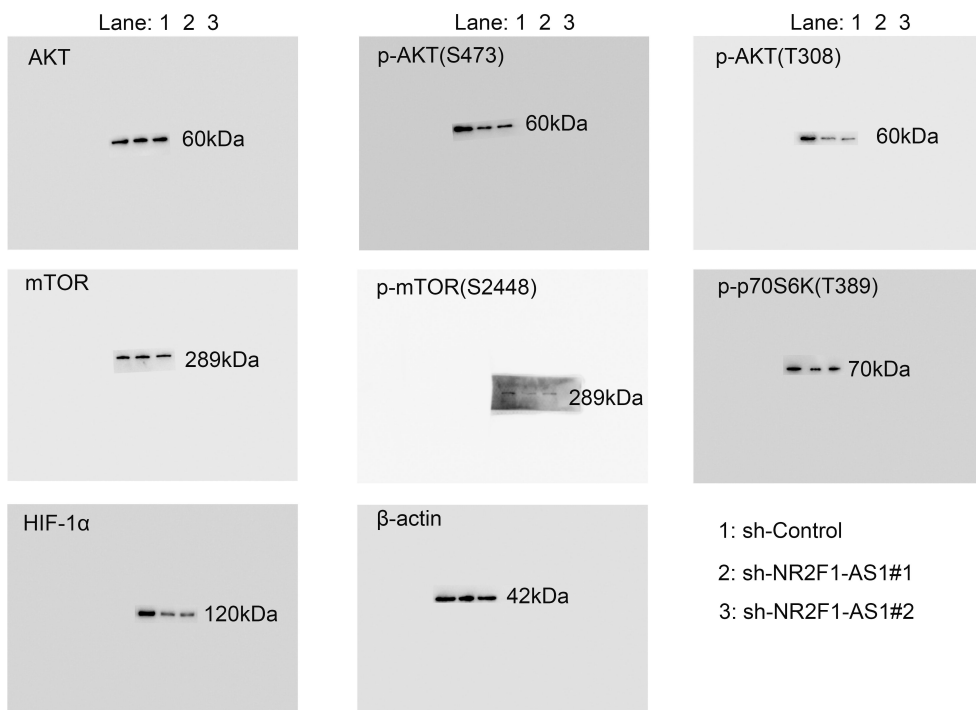

FIG.6B PANC-1

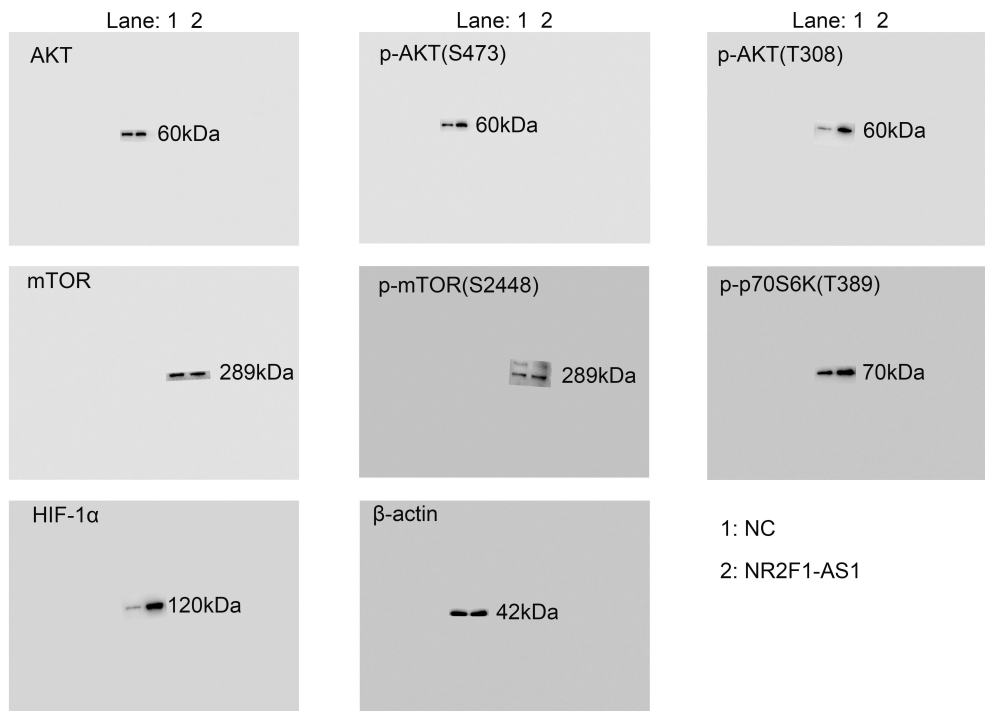

FIG.6B PANC-1

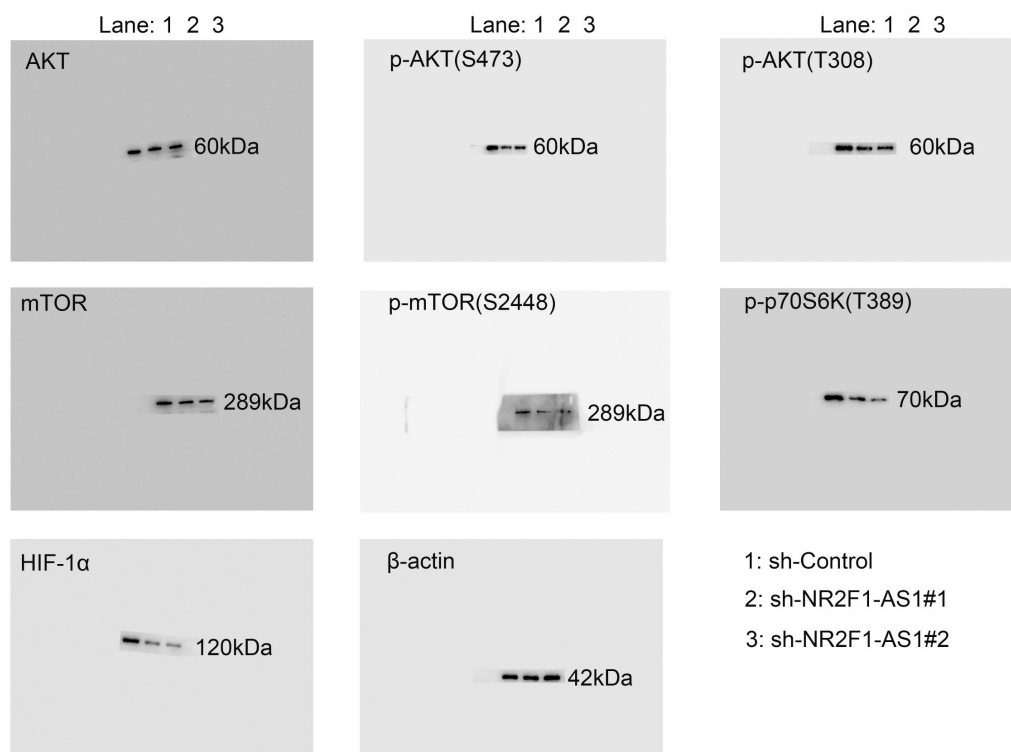

FIG.6G MIA PaCa-2

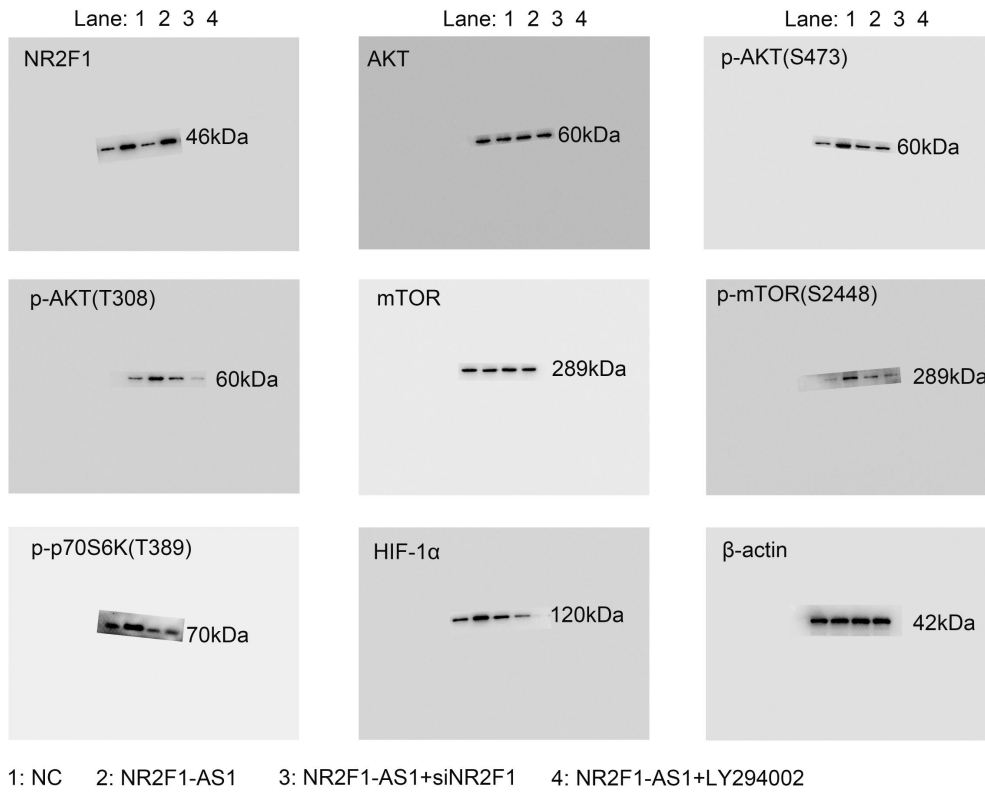

FIG.6G PANC-1

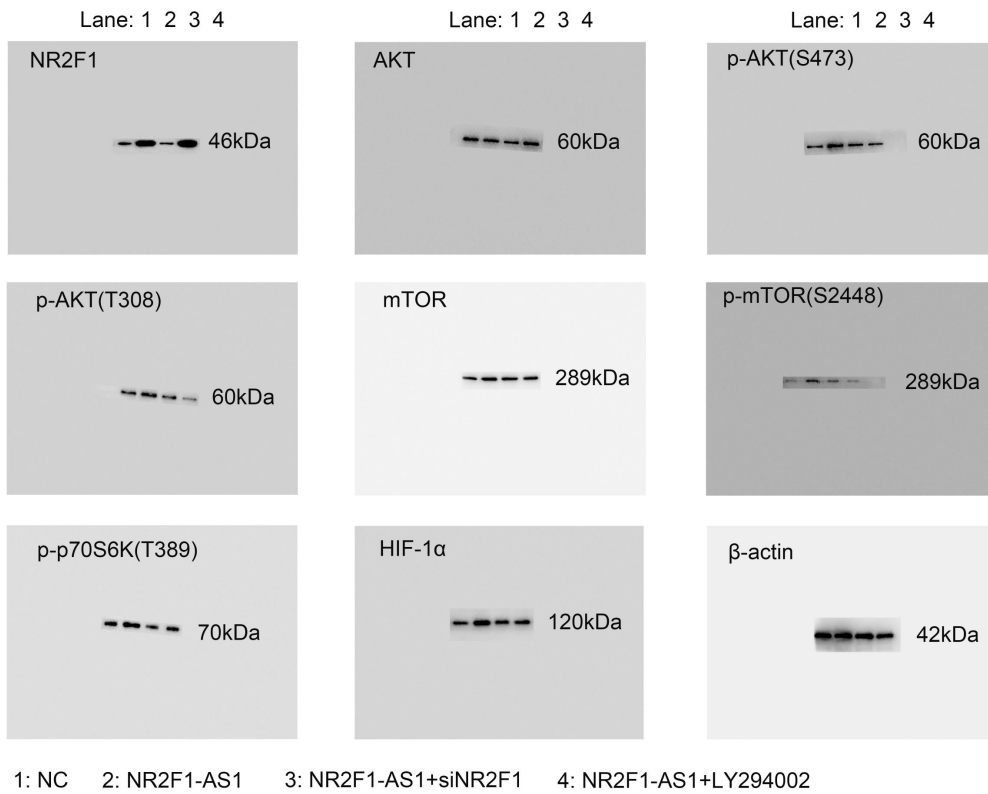

FIG.7E

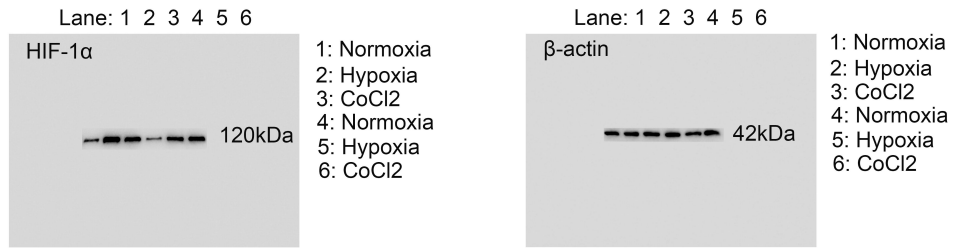

FIG.7H MIA PaCa-2

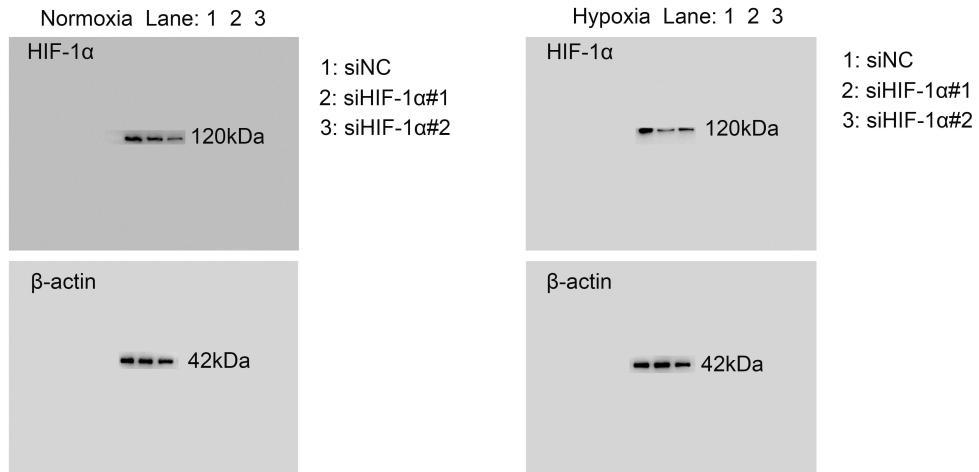

FIG.7H PANC-1

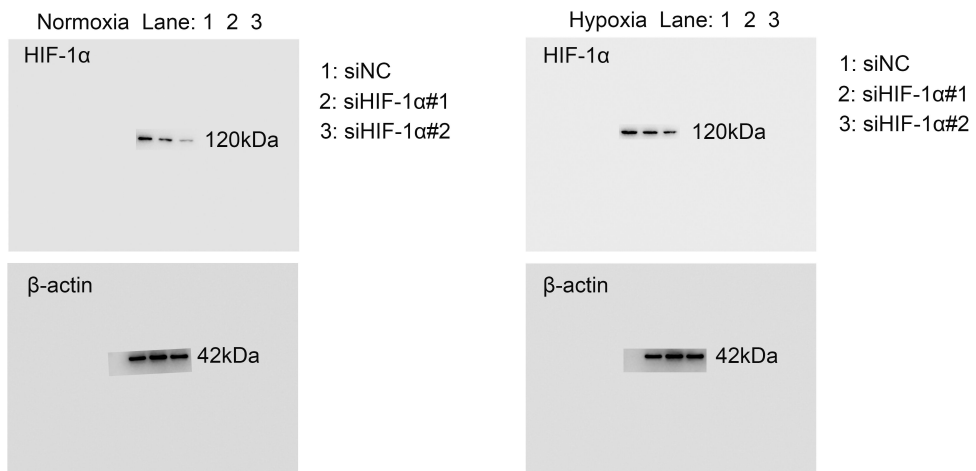

FIG.8B

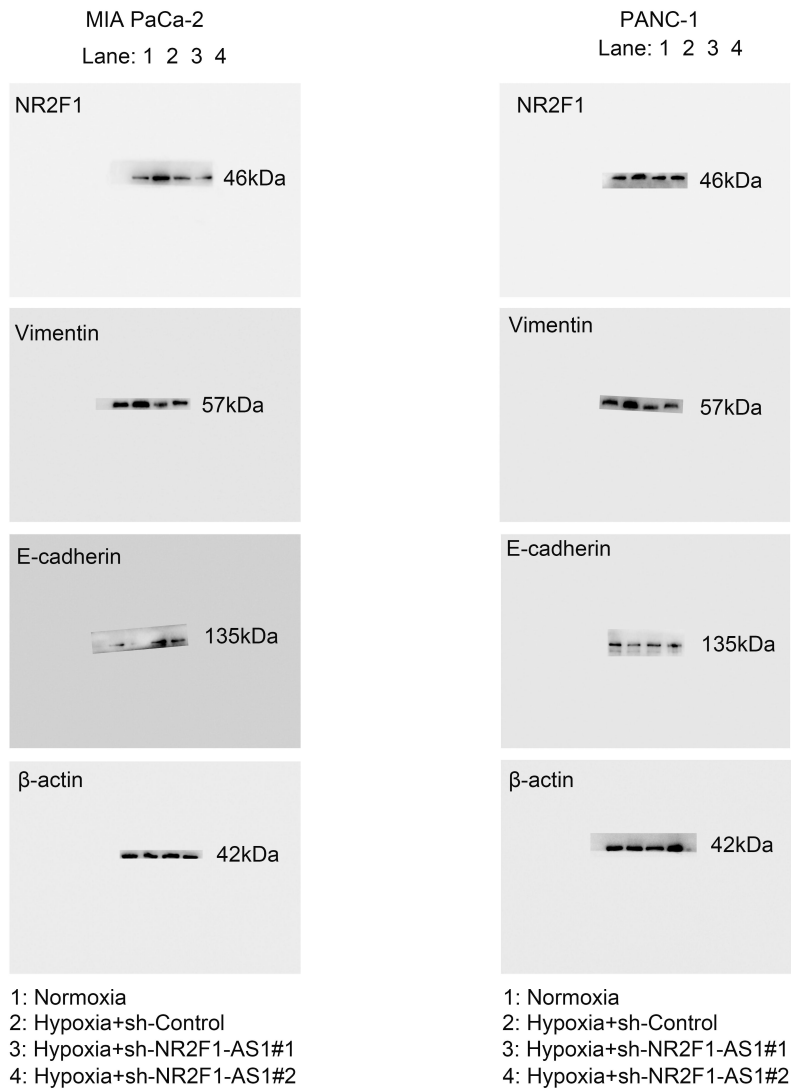

Supplementary Figure S6

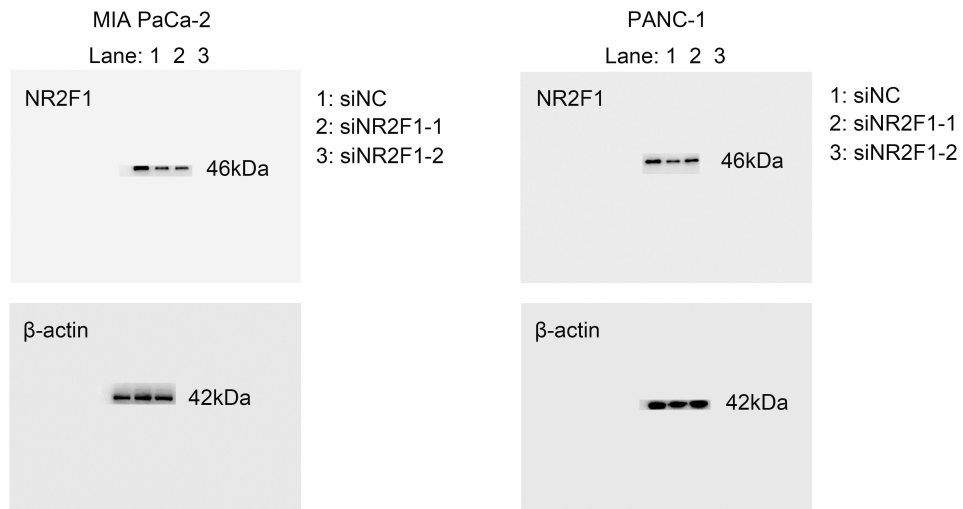

Supplementary Figure S8

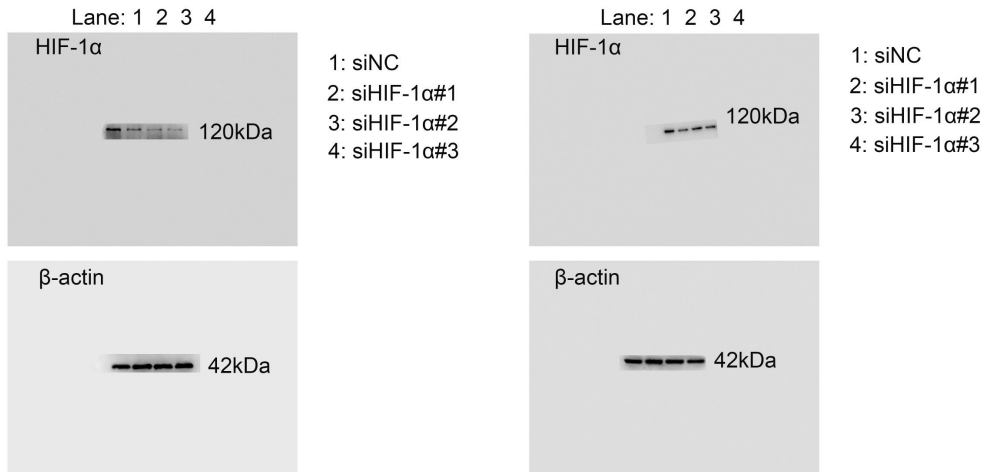

Supplementary Figure S9

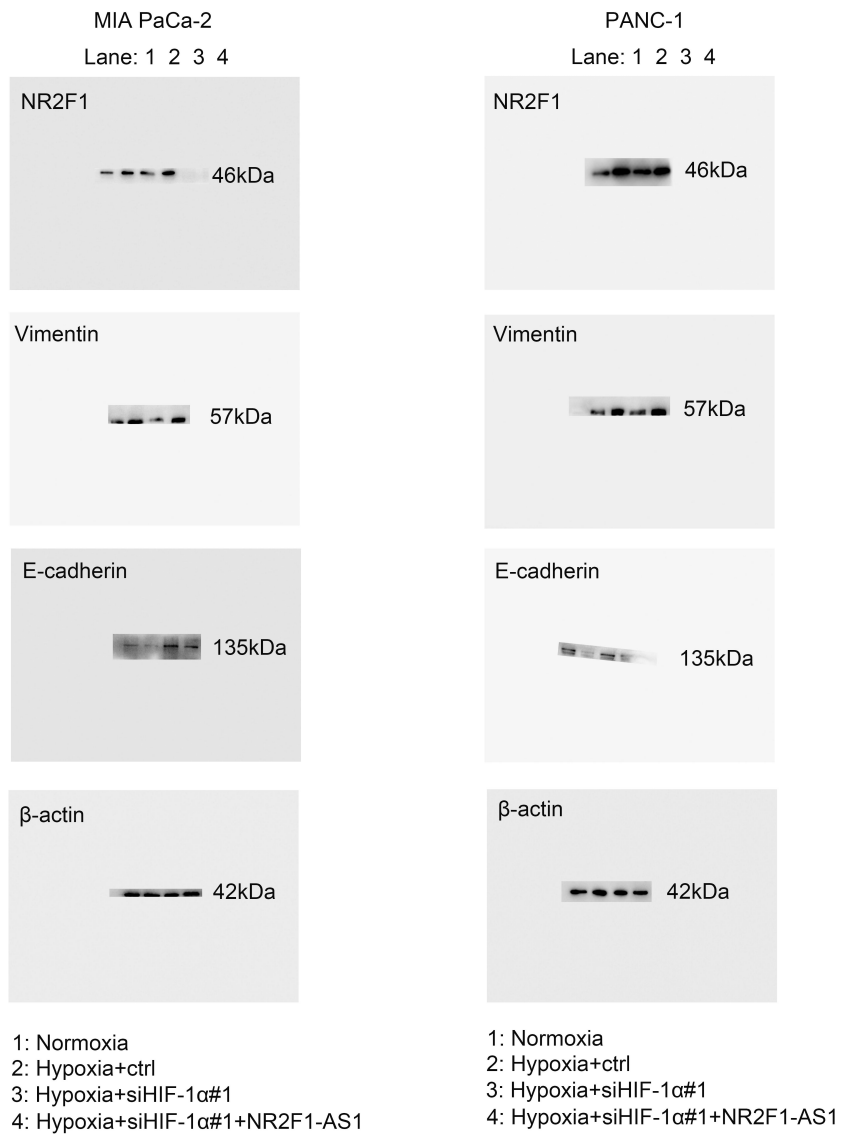

Supplement: 41419_2022_4669_MOESM8_ESM.pdf [file 41419_2022_4669_MOESM8_ESM.pdf]
